# Supplementary material for: Dusp15 Dephosphorylates mtHsp70 at Thr116 to Prevent Its Proteasomal Degradation and Maintain Mitochondrial Unfolded Protein Response in Diabetic Cardiomyopathy
Source: Research Square preprint supplement (doi:10.21203/rs.3.rs-6428877/v1), 2025-05-21
Supplement: Supplementary file 1 [file 35c713b95e4c79464b4c04ff.docx]

**Highlights:**

1.This study investigates Dusp15’s role in regulating the mitochondrial unfolded protein response (mito-UPR) via its interaction with mtHsp70 and explores its therapeutic potential in DCM. Transcriptomic and proteomic analyses identified Dusp15 as a critical regulator in DCM.

**2.** Mechanistically, Dusp15 interacted with the N-terminal binding domain (NBD) of mtHsp70 via its phosphatase domain, targeting Thr116 within the TFY motif for dephosphorylation. This prevented mtHsp70 proteasomal degradation, maintained mito-UPR activity, mitochondrial membrane potential, and redox balance. mtHsp70 phosphorylation-deficient mice (*mtHsp70T116A*) mice resisted hyperglycemia-induced myocardial dysfunction, fibrosis, and inflammation, while phosphorylation-mimetic T116D mutants negated Dusp15-mediated cardioprotection.

**3.**Therapeutically, a drug screen integrating RNA sequencing and pathway scoring identified dapagliflozin (DAPA) as a cardioprotective candidate. DAPA upregulated Dusp15, stabilized mtHsp70, and improved cardiac outcomes, effects absent in *Dusp15Cko* mice. Inhibition of mito-UPR negated Dusp15 and DAPA benefits. Dusp15 preserves mitochondrial integrity and cardiac function in DCM by dephosphorylating mtHsp70 at Thr116. Targeting the Dusp15/mtHsp70 axis, including with DAPA, offers a promising strategy for DCM treatment.
